# Supplementary material for: Increased risk of stroke among patients with inflammatory bowel disease: A PRISMA‐compliant meta‐analysis
Source: PubMed Central journal article supplement (PMC8213927; doi:10.1002/brb3.2159), 2021-05-07
Supplement: BRB3-11-e02159-s001.pdf [file BRB3-11-e02159-s001.pdf]

## JBI Critical Appraisal Checklist for Systematic Reviews and Research Syntheses

Reviewer Xiang Wang Date 2021-3-28

Author Yao Chen Year 2021 Record Number \_\_\_\_\_

|                                                                                     | Yes                                 | No                       | Unclear                  | Not applicable                      |
|-------------------------------------------------------------------------------------|-------------------------------------|--------------------------|--------------------------|-------------------------------------|
| 1. Is the review question clearly and explicitly stated?                            | <input checked="" type="checkbox"/> | <input type="checkbox"/> | <input type="checkbox"/> | <input type="checkbox"/>            |
| 2. Were the inclusion criteria appropriate for the review question?                 | <input checked="" type="checkbox"/> | <input type="checkbox"/> | <input type="checkbox"/> | <input type="checkbox"/>            |
| 3. Was the search strategy appropriate?                                             | <input checked="" type="checkbox"/> | <input type="checkbox"/> | <input type="checkbox"/> | <input type="checkbox"/>            |
| 4. Were the sources and resources used to search for studies adequate?              | <input checked="" type="checkbox"/> | <input type="checkbox"/> | <input type="checkbox"/> | <input type="checkbox"/>            |
| 5. Were the criteria for appraising studies appropriate?                            | <input checked="" type="checkbox"/> | <input type="checkbox"/> | <input type="checkbox"/> | <input type="checkbox"/>            |
| 6. Was critical appraisal conducted by two or more reviewers independently?         | <input checked="" type="checkbox"/> | <input type="checkbox"/> | <input type="checkbox"/> | <input type="checkbox"/>            |
| 7. Were there methods to minimize errors in data extraction?                        | <input checked="" type="checkbox"/> | <input type="checkbox"/> | <input type="checkbox"/> | <input type="checkbox"/>            |
| 8. Were the methods used to combine studies appropriate?                            | <input checked="" type="checkbox"/> | <input type="checkbox"/> | <input type="checkbox"/> | <input type="checkbox"/>            |
| 9. Was the likelihood of publication bias assessed?                                 | <input checked="" type="checkbox"/> | <input type="checkbox"/> | <input type="checkbox"/> | <input type="checkbox"/>            |
| 10. Were recommendations for policy and/or practice supported by the reported data? | <input type="checkbox"/>            | <input type="checkbox"/> | <input type="checkbox"/> | <input checked="" type="checkbox"/> |
| 11. Were the specific directives for new research appropriate?                      | <input checked="" type="checkbox"/> | <input type="checkbox"/> | <input type="checkbox"/> | <input type="checkbox"/>            |

Overall appraisal: Include  Exclude  Seek further info

Comments (Including reason for exclusion)

No comments

---



---



---
